# Supplementary material for: Hybrids Composed of an Fe-Containing Wells–Dawson Polyoxometalate and Carbon Nanomaterials as Promising Electrocatalysts for the Oxygen Reduction Reaction
Source: MDPI journal article supplement (doi:10.3390/inorganics11100388), 2023-09-29
Supplement: s1 [file s1]

# **Hybrids made of a Fe-containing Wells-Dawson polyoxometalate and carbon nanomaterials as promising electrocatalysts for the oxygen reduction reaction**

Hugo C. Novais<sup>a</sup>, Bruno Jarrais<sup>a</sup>, Israël-Martyr Mbomekallé<sup>b</sup>, Anne-Lucie Teillout<sup>b</sup>, Pedro de Oliveira<sup>b</sup>, Cristina Freire<sup>a</sup>, Diana M. Fernandes<sup>a\*</sup>

<sup>a</sup> REQUIMTE/Departamento de Química e Bioquímica, Faculdade de Ciências, Universidade do Porto, 4169-007 Porto, Portugal.

<sup>b</sup> Equipe d'Electrochimie et de Photo-électrochimie, Institut de Chimie Physique, UMR 8000 CNRS, Faculté des Sciences d'Orsay, Université Paris-Saclay, , Orsay F-91405, France.

\*Corresponding authors: Dr. Diana M. Fernandes (diana.fernandes@fc.up.pt)

*Keywords:* Oxygen Reduction Reaction, Electrocatalysis, Carbon Materials, Polyoxometalate

## **S1. Experimental**

### **S1.1. Materials and solvents**

The POM salt  $K_7[P_2W_{17}(FeOH_2)O_{61}] \cdot 20H_2O$  was prepared according to the reported procedure.<sup>1</sup>

Potassium hydroxide (> 99%, Sigma-Aldrich), Nafion® at 5 wt.% (lower aliphatic alcohols and water, Sigma-Aldrich), isopropanol (99.5 %, Sigma-Aldrich), sulfuric acid (95–97 %, Merck), platinum 20 % on carbon black (Pt/C, HiSPEC® 3000, Alfa Aesar) were used as received from the suppliers. Commercial graphene (sample denoted as GF) was from Graphene Technologies (Lot #GTX-7/6-10.4.13). Multi-walled carbon nanotubes (sample denoted as MWCNT) were commercially obtained from Nanocyl S.A., Ref. 3100 MWCNT (>95% carbon purity; 9.5 nm average diameter). For electrolyte and composites preparation, ultrapure water (18.2 MΩ cm at 25°C, Interlab) was always used.

### **S1.2. Physicochemical characterization**

A Jasco FT/IR-460 Plus spectrophotometer was used to acquire the Fourier-transformed infrared (FTIR) spectra (64 scans, resolution of 4 cm<sup>-1</sup>, between 400 and 4000 cm<sup>-1</sup>). The spectra were obtained for samples dispersed (0.2 wt. %) in KBr pellets (spectroscopic grade, Merck).

X-ray photoelectron spectroscopy (XPS) measurements were performed at “Centro de Materiais da Universidade do Porto” (CEMUP), Portugal, in a VG Scientific ESCALAB 200A spectrometer with non-monochromatized Al Kα radiation (1486.6 eV). Potential deviations induced by electric charge of the samples were corrected using the C 1s band at 284.6 eV as an internal standard. The high-resolution spectra analysis and deconvolution was performed with the CasaXPS software.

The scanning electron microscopy/energy-dispersive X-ray spectroscopy (SEM/EDX) images were acquired using a high resolution (Schottky) environmental SEM with X-ray

microanalysis and electron backscattered diffraction analysis (Quanta 400 FEG ESEM/EDAX Genesis X4M), in high-vacuum conditions, at CEMUP.

### **S1.3. ORR electrochemical tests**

An Autolab PGSTAT 302N (EcoChimie B.V.) potentiostat/galvanostat, controlled by the NOVA v2.1 software was employed for the cyclic voltammetry (CV) and linear sweep voltammetry (LSV) studies. The experiments were carried out at room temperature using a conventional three-electrode compartment cell.

A modified glassy carbon rotating disk electrode, RDE (Metrohm, 3 mm diameter) was used as the working electrode while an Ag/AgCl (Metrohm, 3 M KCl) and a carbon rod (Metrohm, 2 mm diameter) were used as reference and counter electrodes, respectively. Prior to modification of the bare electrodes, the RDE was polished with 6, 3 and 1  $\mu\text{M}$  diamond polishing pastes (Buehler) on a MicroCloth polishing pad (BAS), followed by washing with ultrapure water. Then, a  $2 \times 2.5 \mu\text{L}$  drop of selected electrocatalyst dispersion was deposited on the RDE and left to dry under an airflow.

For the RDE modification, 1 mg of EC ( $\text{P}_2\text{W}_{17}\text{Fe}@CM$  or Pt/C) and a mixture of 125  $\mu\text{L}$  of isopropanol, 125  $\mu\text{L}$  of ultrapure water and 20  $\mu\text{L}$  of Nafion (5 wt%) were ultrasonically dispersed for 20 min. The electrochemical tests were carried out in  $\text{N}_2$ - or  $\text{O}_2$ -saturated KOH ( $0.1 \text{ mol dm}^{-3}$ ). To achieve this, the electrolyte was bubbled for 40 min with the selected gas.

The CV measurements were performed at  $0.005 \text{ V s}^{-1}$  and the LSV ones at  $0.005 \text{ V s}^{-1}$  with rotation speeds in the range 400 - 3000 rpm. The ORR current obtained in  $\text{N}_2$ -saturated KOH ( $0.1 \text{ mol dm}^{-3}$ ) was subtracted from that obtained in  $\text{O}_2$ -saturated KOH. The chronoamperometry (CA) tests were done at a potential ( $E$ ) of 0.5 V vs. RHE and a rotation speed of 1600 rpm for 36000 s. Resistance to methanol was evaluated by CA at  $E = 0.5 \text{ V}$  vs. RHE and 1600 rpm for 2500 s.

The onset potential ( $E_{\text{onset}}$ ) is defined as the potential at which the reduction of  $\text{O}_2$  begins and it was determined as described in the literature.<sup>2</sup> The electrochemical potentials and the  $E_{\text{onset}}$  values determined vs. Ag/AgCl were converted to the reversible hydrogen electrode (RHE) using the following equation:

$$E_{\text{(RHE)}} = E_{\text{(Ag/AgCl)}} + 0.059 \text{ pH} + E^{\circ}_{\text{(Ag/AgCl)}} \quad (\text{S1})$$

where  $E_{\text{(RHE)}}$  is the potential vs. RHE,  $E^{\circ}_{\text{(Ag/AgCl)}} = 0.1976 \text{ V}$  (25 °C) and  $E_{\text{(Ag/AgCl)}}$  is the potential measured vs. Ag/AgCl.<sup>3</sup>

To analyse the LSV data and the number of electrons transferred per  $\text{O}_2$  molecule ( $n_{\text{O}_2}$ ) in the oxygen reduction reaction the Koutecky-Levich (K-L) equation was used:

$$\frac{1}{j} = \frac{1}{j_L} + \frac{1}{j_k} = \frac{1}{B\omega^{1/2}} + \frac{1}{j_k} \quad (\text{S2})$$

Here,  $j$  is the current density measured,  $j_L$  the diffusion-limiting current density,  $j_k$  the kinetic current density and  $\omega$  the angular velocity. The parameter  $B$  is associated to the diffusion limiting current density expressed by the following equation:

$$B = 0.2 n_{\text{O}_2} F (D_{\text{O}_2})^{2/3} \nu^{-1/6} C_{\text{O}_2} \quad (\text{S3})$$

with  $F = 96485 \text{ C mol}^{-1}$ ,  $D_{\text{O}_2}$  the  $\text{O}_2$  diffusion coefficient,  $\nu$  the electrolyte kinematic viscosity and  $C_{\text{O}_2}$  the  $\text{O}_2$  bulk concentration. For rotation speeds in rpm is adopted a constant 0.2. Additionally, in the electrolyte used KOH ( $0.1 \text{ mol dm}^{-3}$ ):  $D_{\text{O}_2} = 1.95 \times 10^{-5} \text{ cm}^2 \text{ s}^{-1}$ ,  $\nu = 0.008977 \text{ cm}^2 \text{ s}^{-1}$  and  $C_{\text{O}_2} = 1.15 \times 10^{-3} \text{ mol dm}^{-3}$ .<sup>4</sup>

Tafel plots ( $E_{\text{(RHE)}}$  vs.  $\log j_k$ ) were obtained after the measured LSV currents were rectified for diffusion to yield the corresponding kinetic current values. The  $j_L$  parameter, determined combining equations (S2) and (S3), was used to make the mass transport correction. The values of  $j_k$  obtained were normalized for the total deposited mass of EC.

Tests with a rotating ring disk electrode (RRDE) were performed as well for a more complete examination of the ECs. The electrode was polished for 15 min with aluminium oxide 0.3  $\mu\text{m}$  and washed with ultrapure water. The LSV experiments were conducted at 0.005  $\text{V s}^{-1}$  and 1600 rpm in  $\text{O}_2$ -saturated KOH. A constant potential of 1.2 V vs RHE was applied at the Pt ring electrode. The percentage of  $\text{HO}_2^-$  produced was calculated from Eq. 4 below, using the currents measured on the ring ( $i_R$ ) and on the disk ( $i_D$ ) electrodes, and the current collection efficiency of the ring ( $N$ ).<sup>5</sup>

$$\% \text{HO}_2^- = 200 \times \frac{i_R/N}{i_D + i_R/N} \quad (\text{S4})$$

#### **S1.4. Assessment of electrochemically active surface areas (ECSA)**

ECSA values exhibited by electrocatalysts are usually calculated by using the following equation:

$$\text{ECSA} = C_{dl} / C_{ref} \quad (\text{S5})$$

where  $C_{dl}$  stands for the double-layer capacitance and  $C_{ref}$  for the reference capacitance value per unit area. Due to the impossibility of knowing the exact  $C_{ref}$  value for specific and structurally complex materials, reliable ECSA values cannot be obtained easily. However, the linear proportional relation between ECSA and the double-layer capacitance allows performing a relative comparison for similar electrocatalysts. Taking advantage of this fact, in the present work,  $C_{dl}$  values have been directly employed as approximated ECSA estimations to assess the surface effects on the ORR performances. Thus,  $C_{dl}$  values were calculated for all materials via a standard double-layer charging test, namely, the acquisition of consecutive CV plots at different scan rates (from 20 to 160  $\text{mV s}^{-1}$ ), being the double-layer capacitance estimated from the slope of a linear-fitted plot of current density at 1.13 V vs. RHE (non-faradaic region) versus the scan rate.

## Figures

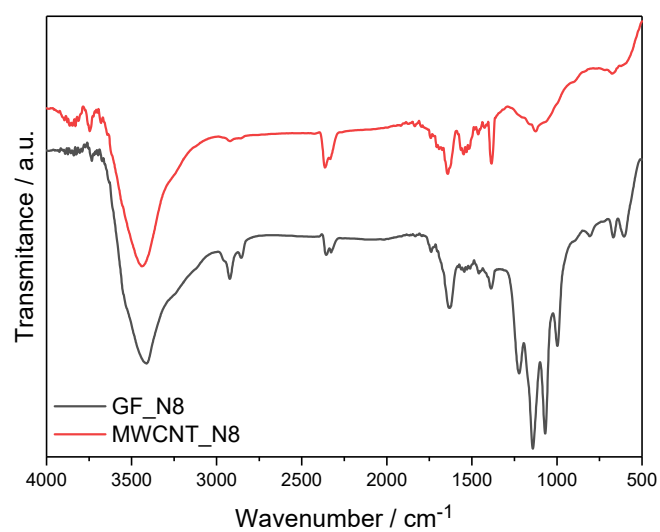

**Figure S1.** FTIR spectra in the 4000–500  $\text{cm}^{-1}$  range of the nitrogen doped carbon materials GF\_N8 (black) and MWCNT\_N8 (red).

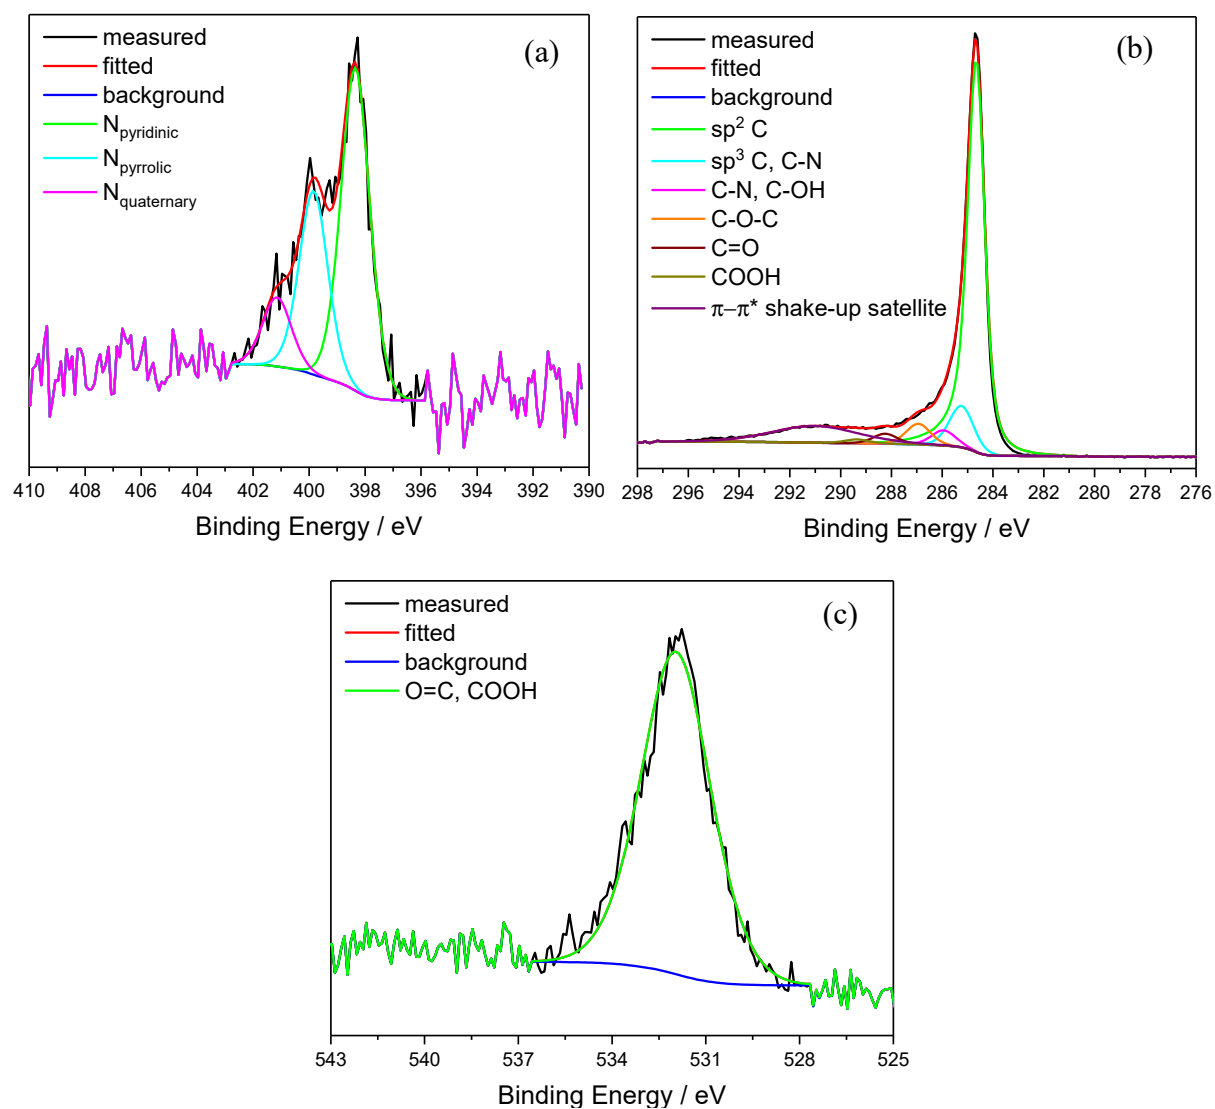

**Figure S2.** XPS deconvoluted spectra of corresponding elements of the GF\_N8.

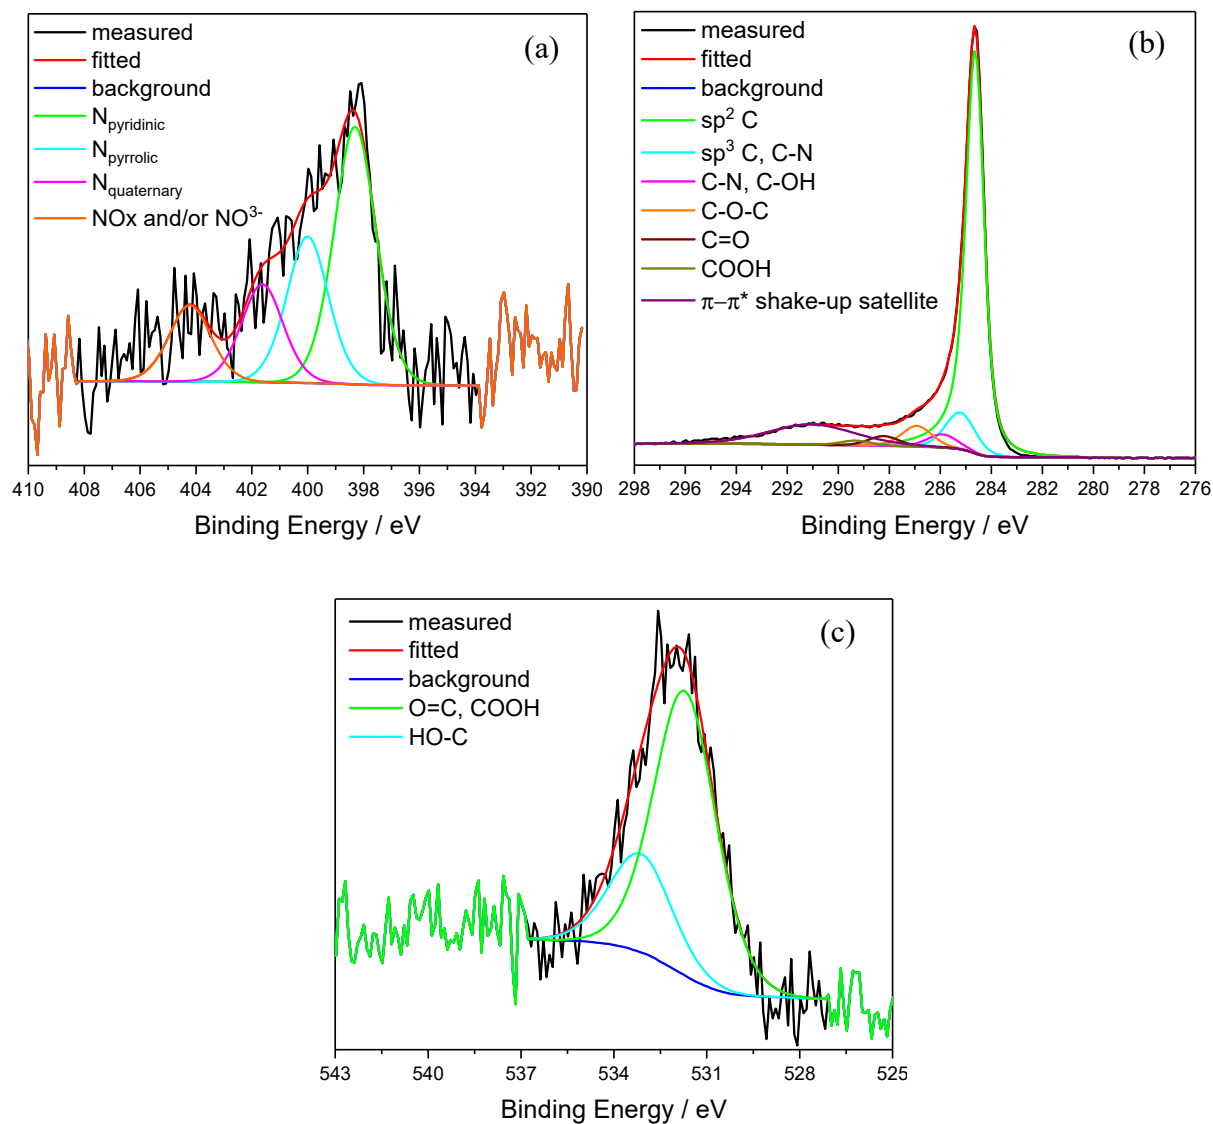

**Figure S3.** XPS deconvoluted spectra of corresponding elements of the MWCNT\_N8.



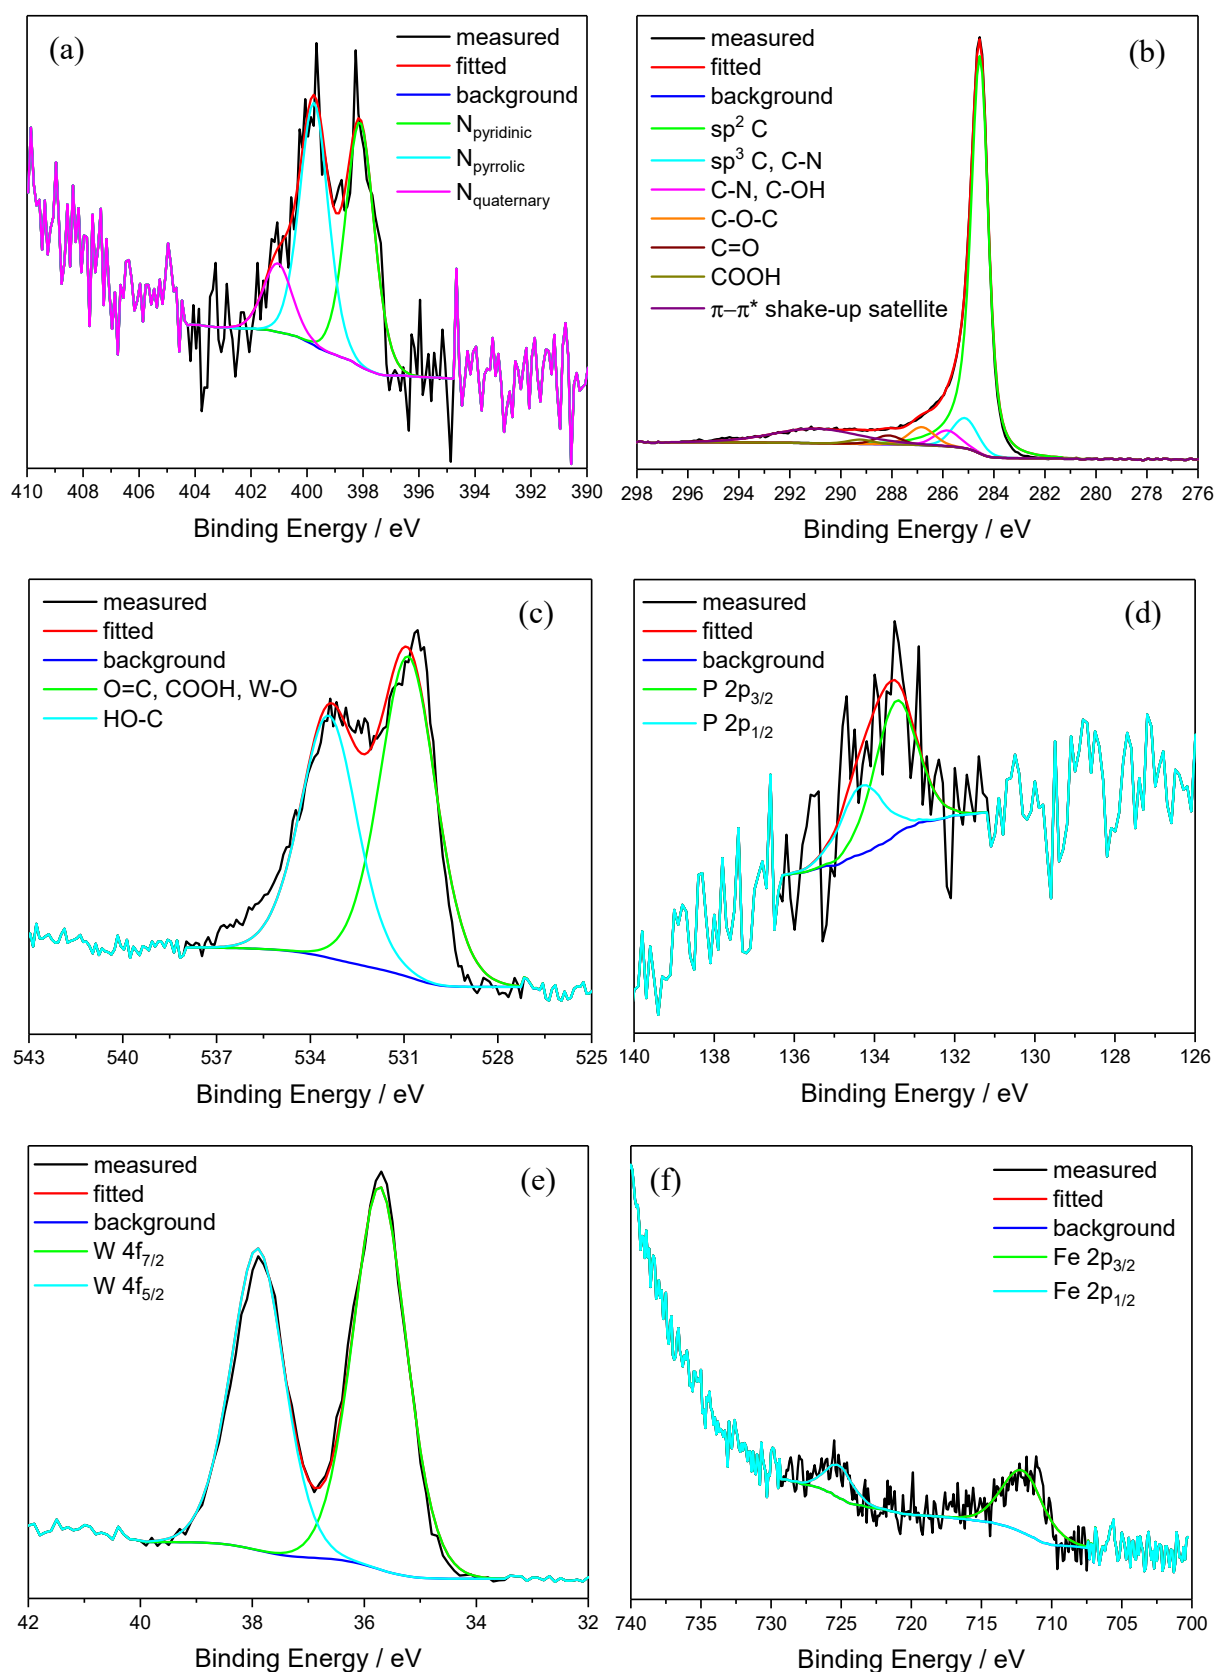

**Figure S4.** XPS deconvoluted spectra of corresponding elements in the  $P_2W_{17}Fe@GF\_N8$  composite.

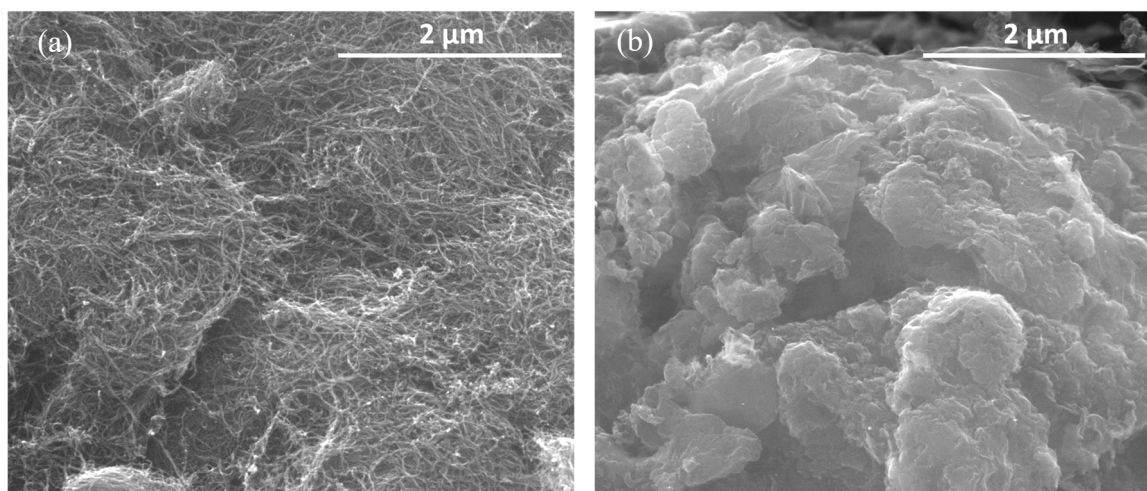

**Figure S5.** SEM images of MWCNT\_N8 (a) and GF\_N8 (b) at 50000 $\times$  magnification.

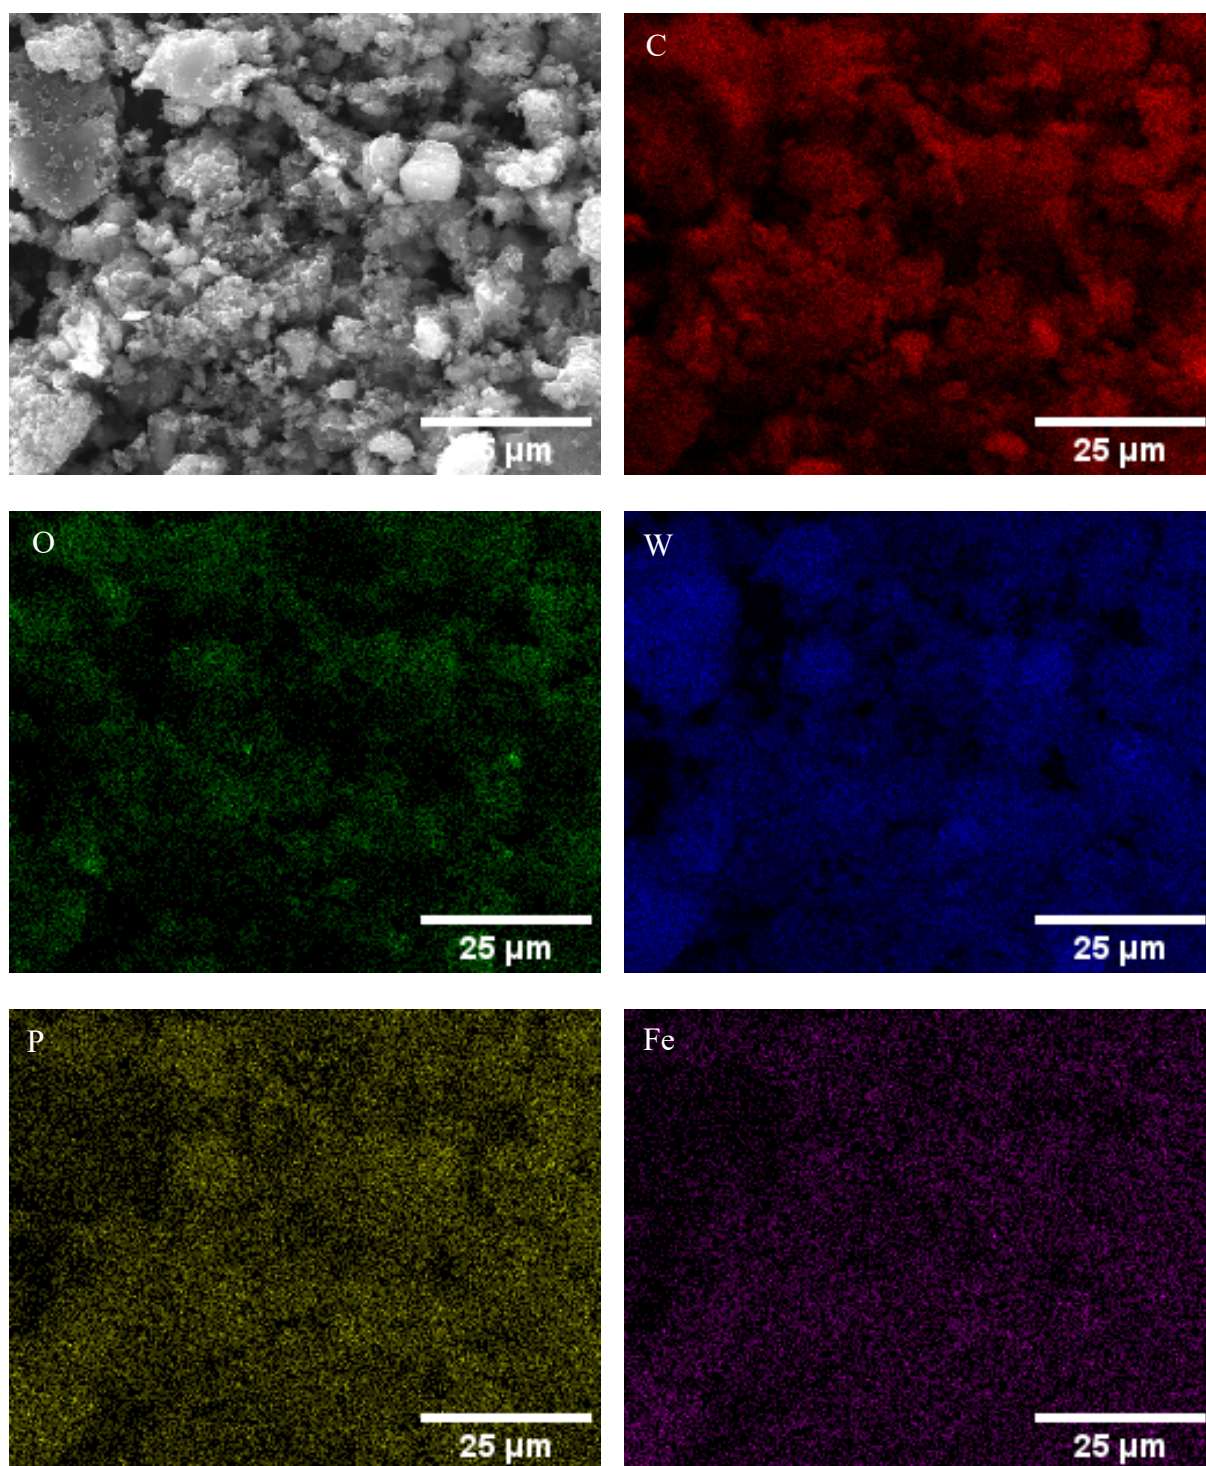

**Figure S6.** SEM and EDX elemental mapping images of  $\text{P}_2\text{W}_{17}\text{Fe}@GF\_N8$ , at 5000 $\times$  magnification for the elements C (red), O (green), W (blue), P (yellow) and Fe (purple).

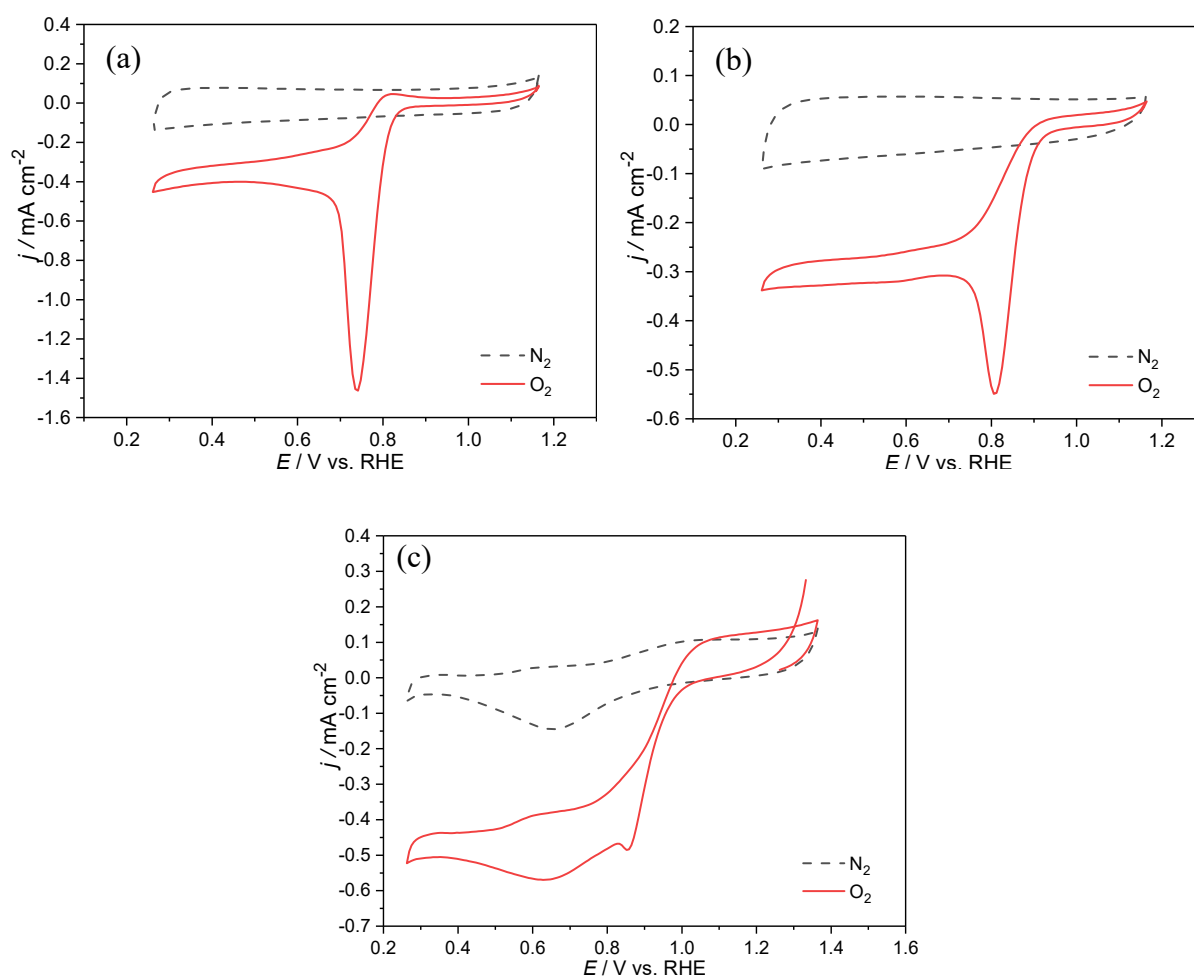

**Figure S7.** CVs of MWCNT\_N8 (a), GF\_N8 (b) and Pt/C (20 wt. %) (c) modified electrodes in  $\text{N}_2$ -saturated (dash line) and  $\text{O}_2$ -saturated (full line)  $0.1 \text{ mol dm}^{-3}$  KOH solution at  $0.005 \text{ V}$ .

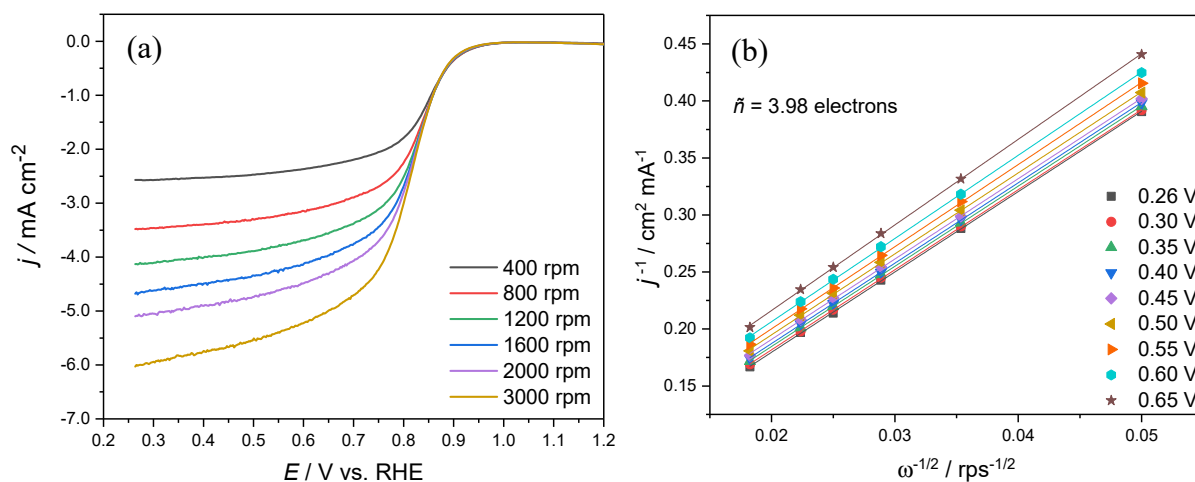

**Figure S8.** ORR LSV polarization curves for Pt/C (20 wt. %) at different rotation rates in O<sub>2</sub>-saturated 0.1 mol dm<sup>-3</sup> KOH solution at 0.005 V s<sup>-1</sup> (a), and the corresponding Koutecky-Levich (K-L) plots (b).

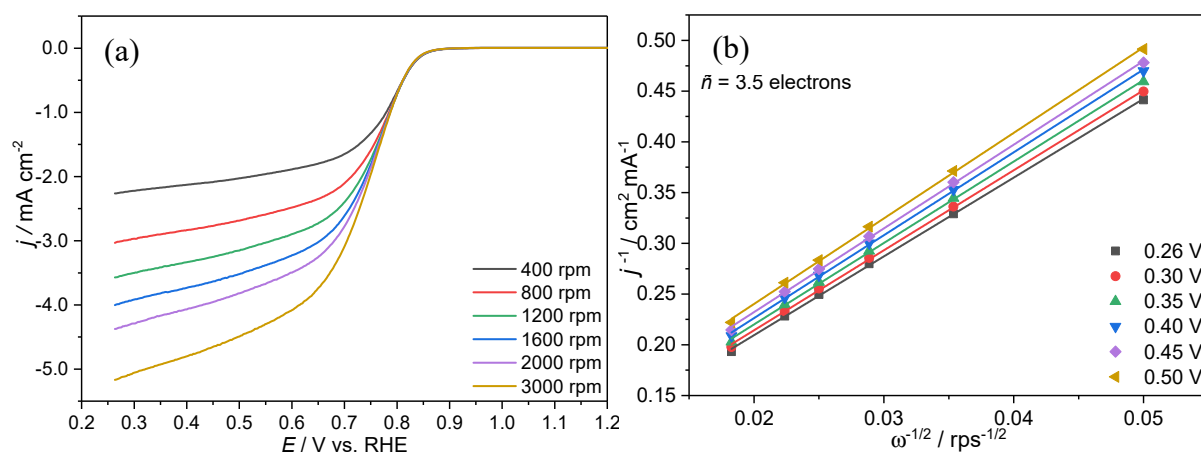

**Figure S9.** ORR LSV polarization curves for MWCNT\_N8 at different rotation rates in O<sub>2</sub>-saturated 0.1 mol dm<sup>-3</sup> KOH solution at 0.005 V s<sup>-1</sup> (a), and the corresponding Koutecky-Levich (K-L) plots (b).

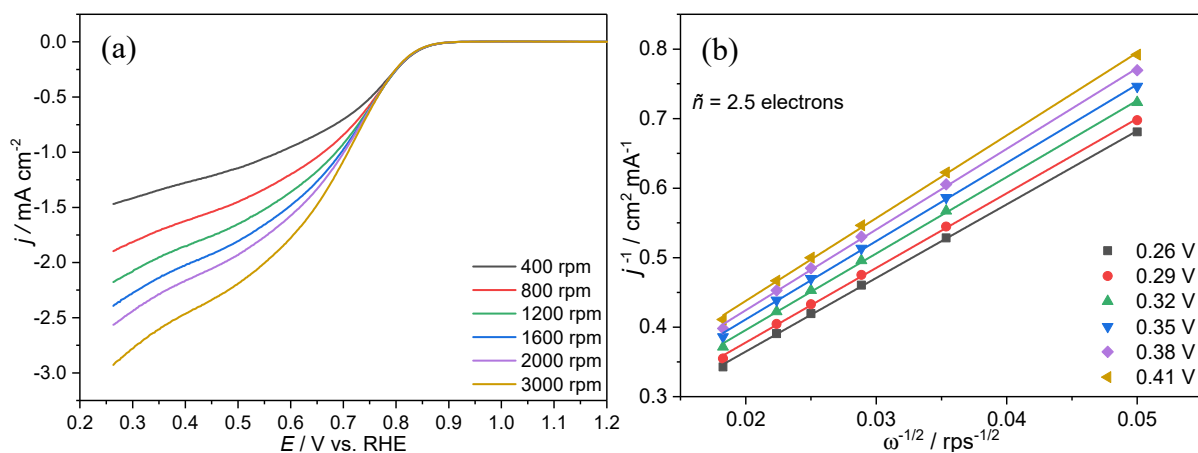

**Figure S10.** ORR polarization curves for GF\_N8 at different rotation rates in O<sub>2</sub>-saturated 0.1 mol dm<sup>-3</sup> KOH solution at 0.005 V s<sup>-1</sup> (a), and the corresponding Koutecky-Levich (K-L) plots (b).

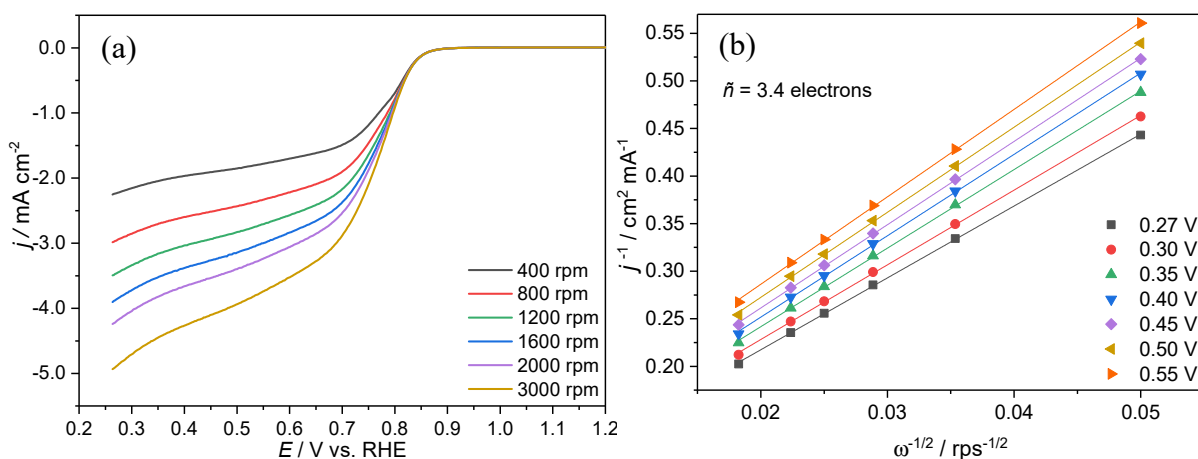

**Figure S11.** ORR LSV polarization curves for P<sub>2</sub>W<sub>17</sub>Fe@MWCNT\_N8 at different rotation rates in O<sub>2</sub>-saturated 0.1 mol dm<sup>-3</sup> KOH solution at 0.005 V s<sup>-1</sup> (a), and the corresponding Koutecky-Levich (K-L) plots (b).

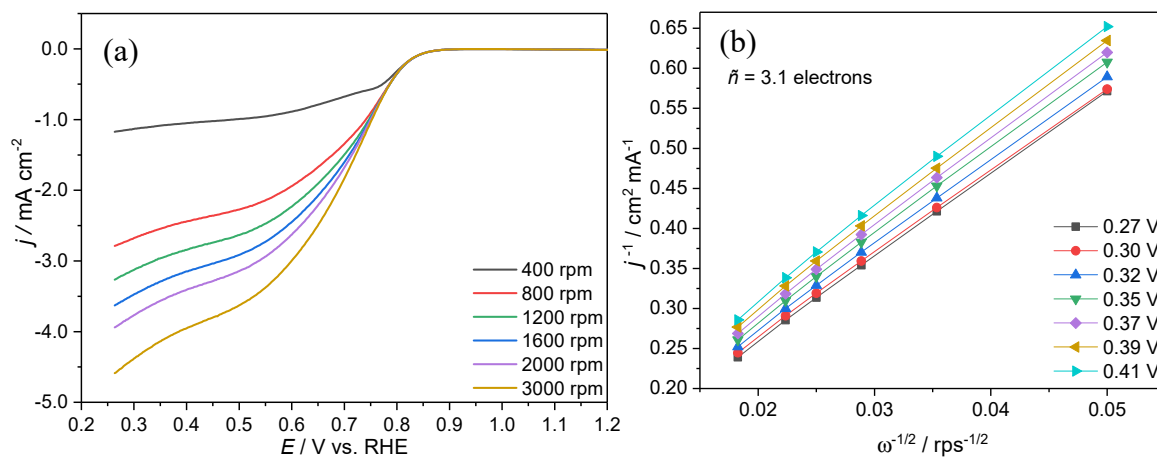

**Figure S12.** ORR LSV polarization curves for P2W17Fe@GF\_N8 at different rotation rates in O<sub>2</sub>-saturated 0.1 mol dm<sup>-3</sup> KOH solution at 0.005 V s<sup>-1</sup> (a), and the corresponding Koutecky-Levich (K-L) plots (b).

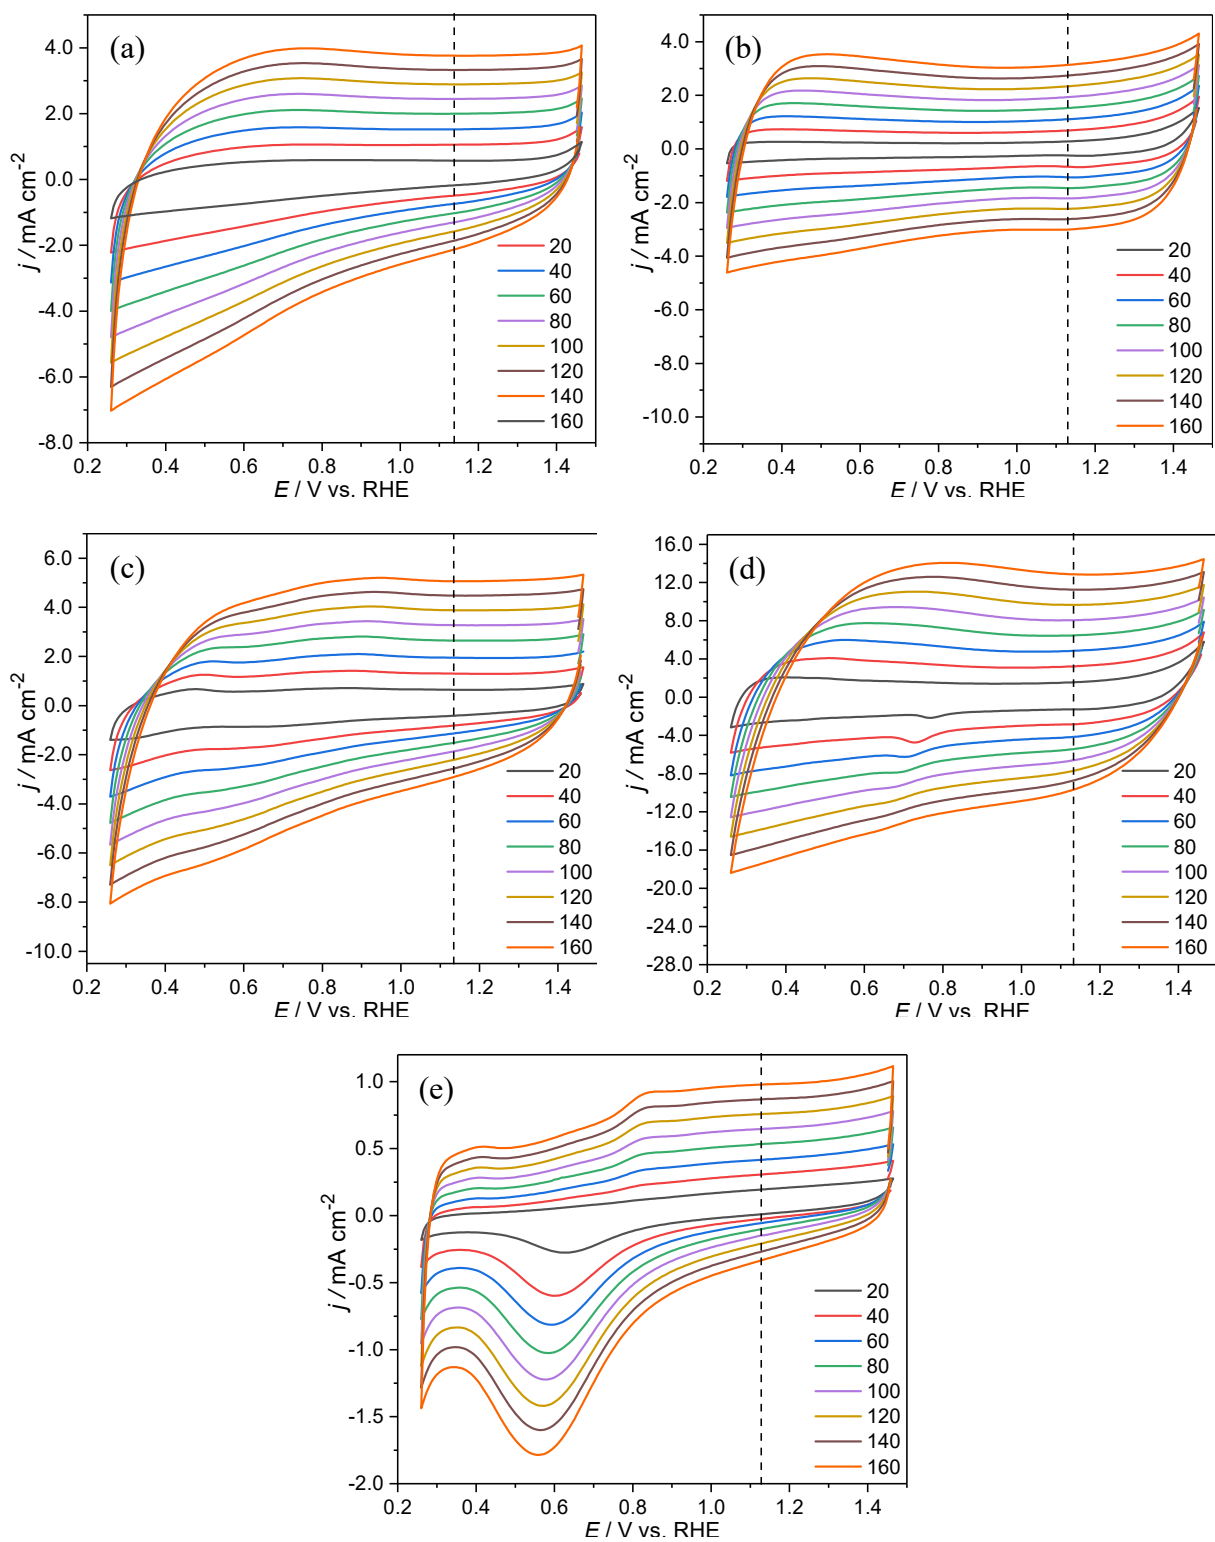

**Figure S13.** CVs at different scan rates for GF\_N8 (a), MWCNT\_N8 (b), P<sub>2</sub>W<sub>17</sub>Fe@GF\_N8 (c), P<sub>2</sub>W<sub>17</sub>Fe@MWCNT\_N8 (d) and Pt/C (e) in N<sub>2</sub>-saturated KOH (0.1 M).



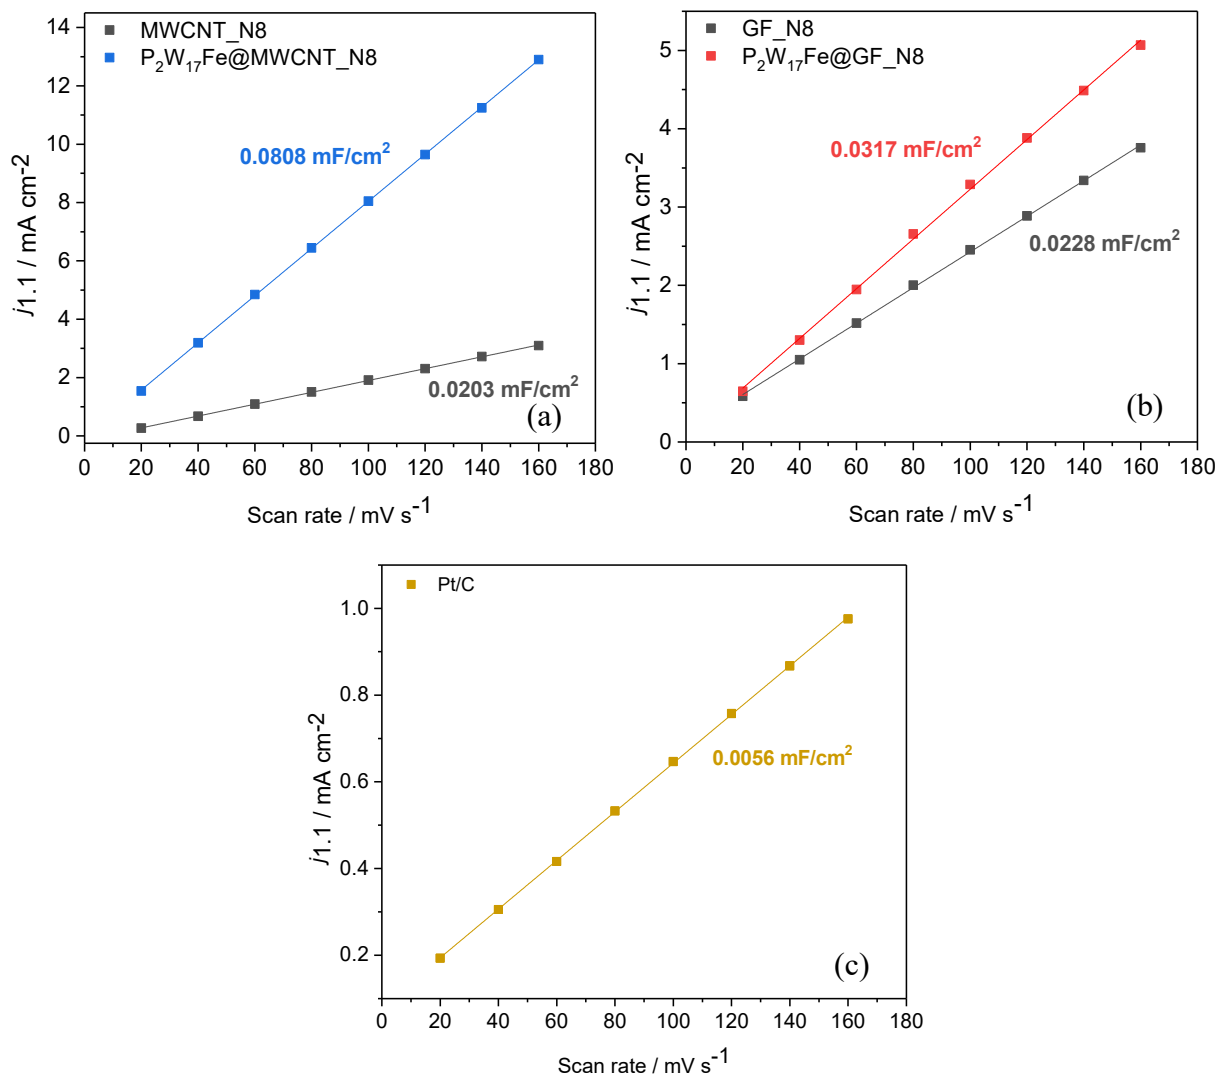

**Figure S14.** Current density-scan rate linear fitting plots for all materials. Numeric values correspond to the double-layer capacitances ( $C_{dl}$ ) for each material.

**Table S1.** Relative atomic percentages of nitrogen presented in the XPS high-resolution N1s spectra of the prepared carbon materials.

| Material                                    | % N                       |                          |                            |                             |
|---------------------------------------------|---------------------------|--------------------------|----------------------------|-----------------------------|
|                                             | 398.5 eV<br>(pyridinic N) | 400.1 eV<br>(pyrrolic N) | 401.6 eV<br>(quaternary N) | 404.1 eV<br>(N in N-oxides) |
| GF_N8                                       | 56.1                      | 31.9                     | 12.0                       | -                           |
| MWCNT_N8                                    | 44.6                      | 25.3                     | 16.9                       | 13.2                        |
| P <sub>2</sub> W <sub>17</sub> Fe@GF_N8     | 44.0                      | 43.6                     | 12.4                       | -                           |
| P <sub>2</sub> W <sub>17</sub> Fe @MWCNT_N8 | 41.2                      | 26.7                     | 23.8                       | 8.3                         |

**Table S2.** ORR performance of transition metal carbon hybrid electrocatalysts obtained from literature.

| Catalyst                                                               | $E_{\text{onset}}$<br>(mV vs. RHE) | $j_L$<br>(mA/m <sup>2</sup> ) | TS<br>(mV/dec) | Stability <sup>a</sup> | Reference |
|------------------------------------------------------------------------|------------------------------------|-------------------------------|----------------|------------------------|-----------|
| P <sub>8</sub> W <sub>48</sub> @N-MWCNT                                | 0.94                               | -3.7                          | 72             | 82% (10h)              | 6         |
| Co <sub>4</sub> (PW <sub>9</sub> ) <sub>2</sub> @N-CNT                 | 0.90                               | -8.5                          | 96             | 78% (5.5h)             | 7         |
| N-PC <sup>b</sup>                                                      | 0.94                               | -                             | 63             | 81.4% (10h)            | 8         |
| CoPOM@C                                                                | 1.00                               | -4.2                          | 65             | -                      | 9         |
| AC <sub>1</sub> <sup>c</sup>                                           | 0.84                               | -3.12                         | 250            | ~80% (5.5h)            | 10        |
| PMo <sub>11</sub> V@GF                                                 | 0.80                               | -1.60                         | 177            | -                      | 11        |
| MWCNT_N8_Co <sub>4</sub>                                               | 0.85                               | -3.52                         | 41             | ~75% (5.5h)            | 12        |
| Fe <sub>3</sub> O <sub>4</sub> /N/C                                    | 0.92                               | -                             | -              | 90% (2.8h)             | 13        |
| NiCo <sub>2</sub> O <sub>4</sub> /NrGO                                 | 0.88                               | -                             | -              | 87% (2h)               | 14        |
| FeP/Fe <sub>2</sub> P/Fe <sub>2</sub> P <sub>2</sub> O <sub>7</sub> /C | 0.86                               | -                             | -              | 87% (12h)              | 15        |
| CuCo <sub>2</sub> O <sub>4</sub> /NrGO                                 | 0.89                               | -                             | -              | 85% (5.6h)             | 16        |
| Fe-N-C                                                                 | 0.96                               | -                             | -              | -                      | 17        |
| Fe-bNCNT/NC-900                                                        | 1.02                               | -                             | 57             | 89% (11.1h)            | 18        |
| P <sub>2</sub> W <sub>17</sub> Fe@GF_N8                                | 0.83                               | -3.3                          | 58             | 68% (10h)              | This work |
| P <sub>2</sub> W <sub>17</sub> Fe@MWCNT_N8                             | 0.84                               | -3.9                          | 48             | 88% (10h)              | This work |

<sup>a</sup> The percentages are of current retention and between bracket is the time; <sup>b</sup> N-doped porous carbon; <sup>c</sup>Biomass residue (Agave sisalana).

## References

1. D. K. Lyon, W. K. Miller, T. Novet, P. J. Domaille, E. Evitt, D. C. Johnson and R. G. Finke, *Journal of the American Chemical Society*, 1991, **113**, 7209-7221.
2. N. Daems, X. Sheng, I. F. J. Vankelecom and P. P. Pescarmona, *Journal of Materials Chemistry A*, 2014, **2**, 4085-4110.
3. S. Hoang, S. Guo, N. T. Hahn, A. J. Bard and C. B. Mullins, *Nano Letters*, 2012, **12**, 26-32.
4. G. Tuci, C. Zafferoni, A. Rossin, A. Milella, L. Luconi, M. Innocenti, L. Truong Phuoc, C. Duong-Viet, C. Pham-Huu and G. Giambastiani, *Chemistry of Materials*, 2014, **26**, 3460-3470.
5. N. Muthuswamy, M. E. M. Buan, J. C. Walmsley and M. Rønning, *Catalysis Today*, 2018, **301**, 11-16.
6. H. C. Novais, B. Jarrais, A. Haider, U. Kortz, A. Guerrero-Ruiz, I. Rodriguez-Ramos, C. Freire and D. M. Fernandes, *Electrocatalysis*, 2023, **14**, 294-305.
7. D. M. Fernandes, H. C. Novais, R. Bacsá, P. Serp, B. n. Bachiller-Baeza, I. Rodríguez-Ramos, A. Guerrero-Ruiz and C. Freire, *Langmuir*, 2018, **34**, 6376-6387.
8. X. Chen, W. Zhang, Y. Qu, X. Chen, Y. Liu and C. Lu, *Journal of Electroanalytical Chemistry*, 2022, **926**, 116909.
9. S. Ingavale, I. Patil, K. Prabakaran and A. Swami, *International Journal of Energy Research*, 2021, **45**, 7366-7379.
10. D. M. Fernandes, A. S. Mestre, A. Martins, N. Nunes, A. P. Carvalho and C. Freire, *Catalysis Today*, 2020, **357**, 269-278.

11. M. Nunes, D. M. Fernandes, I. M. Rocha, M. F. Pereira, I. M. Mbomekalle, P. de Oliveira and C. Freire, *ChemistrySelect*, 2016, **1**, 6257-6266.
12. N. Limani, I. S. Marques, B. Jarrais, A. J. Fernandes, C. Freire and D. M. Fernandes, *Catalysts*, 2022, **12**, 357.
13. Y. Su, H. Jiang, Y. Zhu, X. Yang, J. Shen, W. Zou, J. Chen and C. Li, *Journal of Materials Chemistry A*, 2014, **2**, 7281-7287.
14. H. Zhang, H. Li, H. Wang, K. He, S. Wang, Y. Tang and J. Chen, *Journal of Power Sources*, 2015, **280**, 640-648.
15. Z. Yang, J. Wu, X. Zheng, Z. Wang and R. Yang, *Journal of Power Sources*, 2015, **277**, 161-168.
16. R. Ning, J. Tian, A. M. Asiri, A. H. Qusti, A. O. Al-Youbi and X. Sun, *Langmuir*, 2013, **29**, 13146-13151.
17. M. M. Hossen, K. Artyushkova, P. Atanassov and A. Serov, *Journal of Power Sources*, 2018, **375**, 214-221.
18. F. Lu, K. Fan, L. Cui, B. Li, Y. Yang, L. Zong and L. Wang, *Applied Catalysis B: Environmental*, 2022, **313**, 121464.
